# Supplementary material
Source: publisher figshare collection journal article supplement (https://springernature.figshare.com/ndownloader/files/14738717)
Supplement: Supplementary file [file 14738717]

# Effect of CD14 polymorphisms on the Risk of Cardiovascular Disease: Evidence from a Meta-Analysis

**Running head: CD14 polymorphisms and Cardiovascular**

Jin-Jian Xu<sup>1,2#</sup>, Ke-Qi Liu<sup>3#</sup>, Zhi-Min Ying<sup>4#</sup>, Xiao-Wei Zhu<sup>1</sup>, Xue-Jin Xu<sup>2</sup>, Pian-Pian Zhao<sup>1</sup>, Wei-Yang Bai<sup>1</sup>, Mo-Chang Qiu<sup>3</sup>, Pei-Kuan Cong<sup>2</sup>, Xing-Wei Zhang<sup>2</sup>, Hou-Feng Zheng<sup>1,2\*</sup>

1, Diseases & Population (DaP) Geninfo Lab, School of Life Sciences, Westlake University and Westlake Institute for Advanced Study, Hangzhou, Zhejiang, China.

2, Institute of Ageing Research and the Affiliated Hospital, School of Medicine, Hangzhou Normal University, Hangzhou, Zhejiang, China

3, Jiangxi Medical College, Shangrao, Jiangxi, China

4, The Second Affiliated Hospital, Zhejiang University School of Medicine, Hangzhou, Zhejiang, China

\*Corresponding to: Hou-Feng Zheng, MD, PhD.

E-mail: zhenghoufeng@wias.org.cn

**Table S1. The information of publication bias in all Polymorphisms**

| Polymorphisms | Allele model |       | Dominant model |       | Recessive model |       |
|---------------|--------------|-------|----------------|-------|-----------------|-------|
|               | Z            | P     | Z              | P     | Z               | P     |
| C-159T        | 1.77         | 0.077 | 1.4            | 0.161 | 1.4             | 0.161 |
| C-260T        | 1.56         | 0.118 | 2.51           | 0.012 | 1.12            | 0.264 |

**a1**

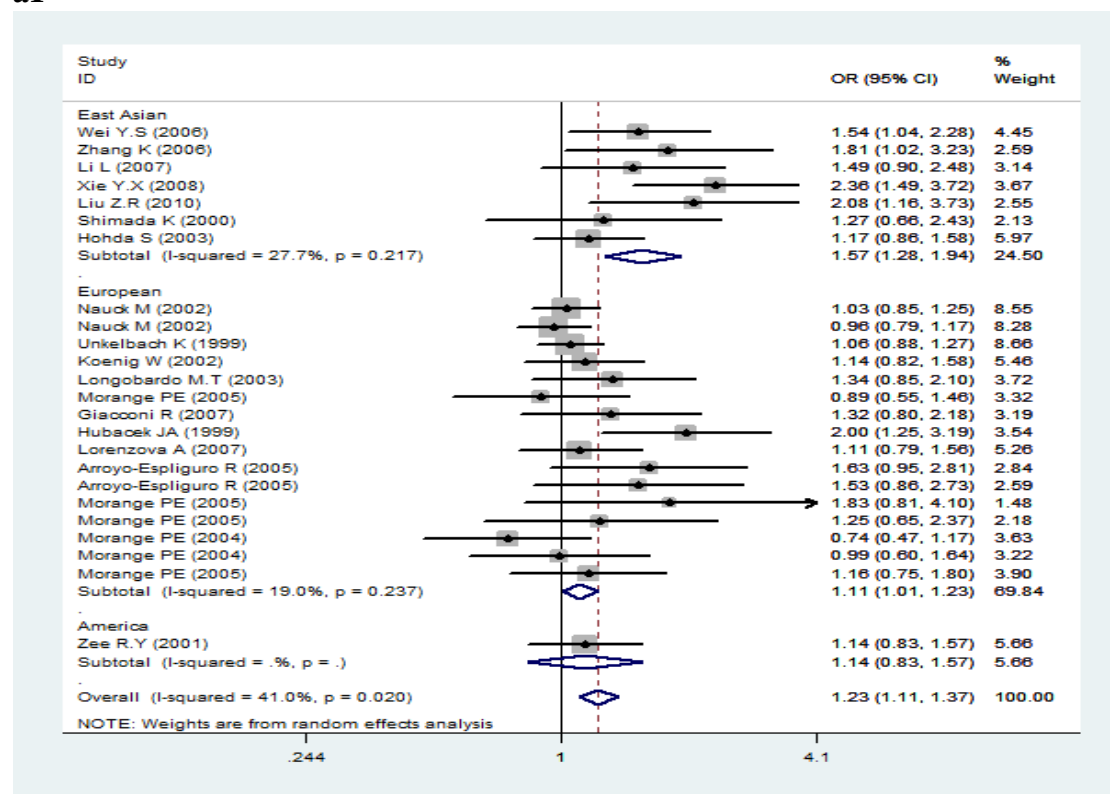

a2

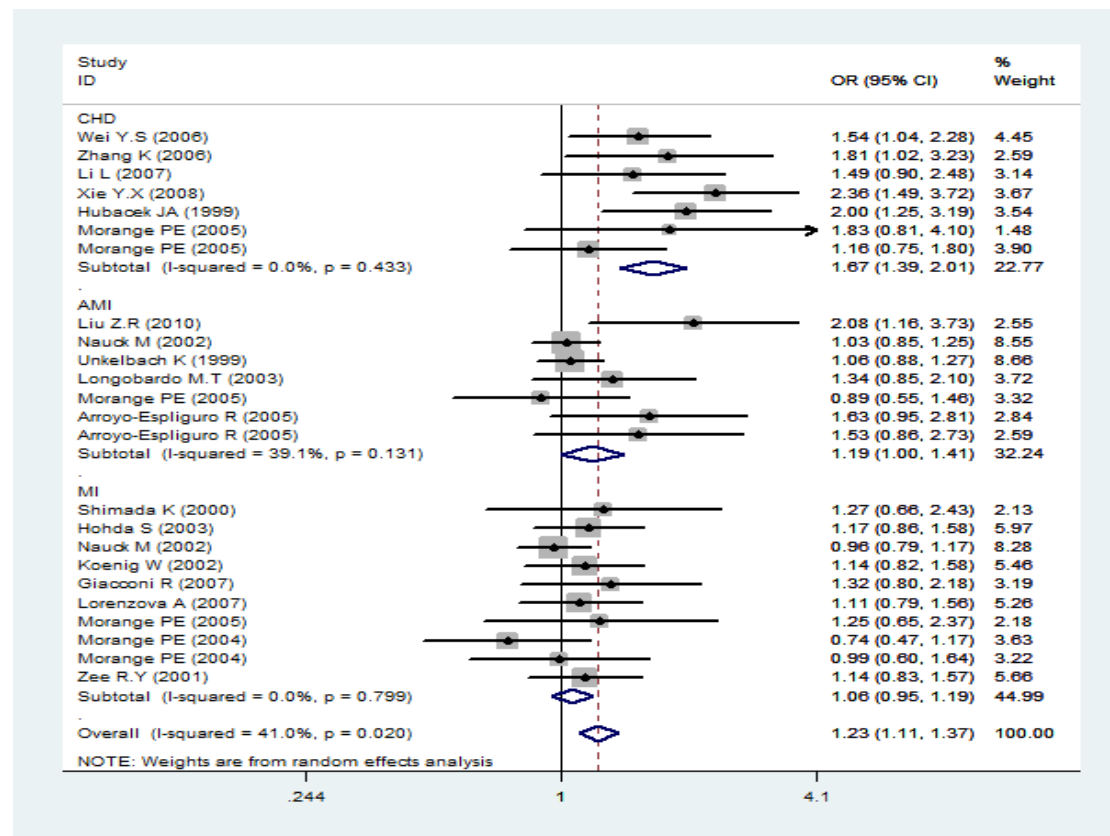

b1

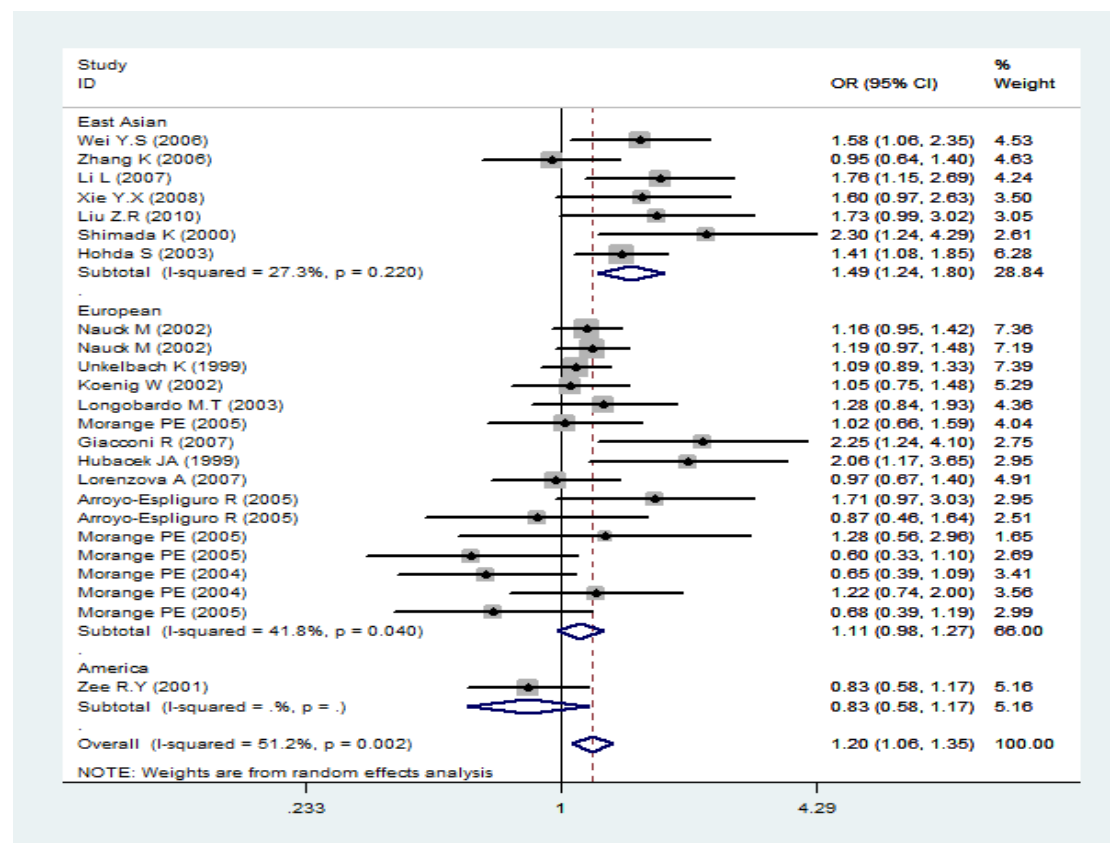

b2

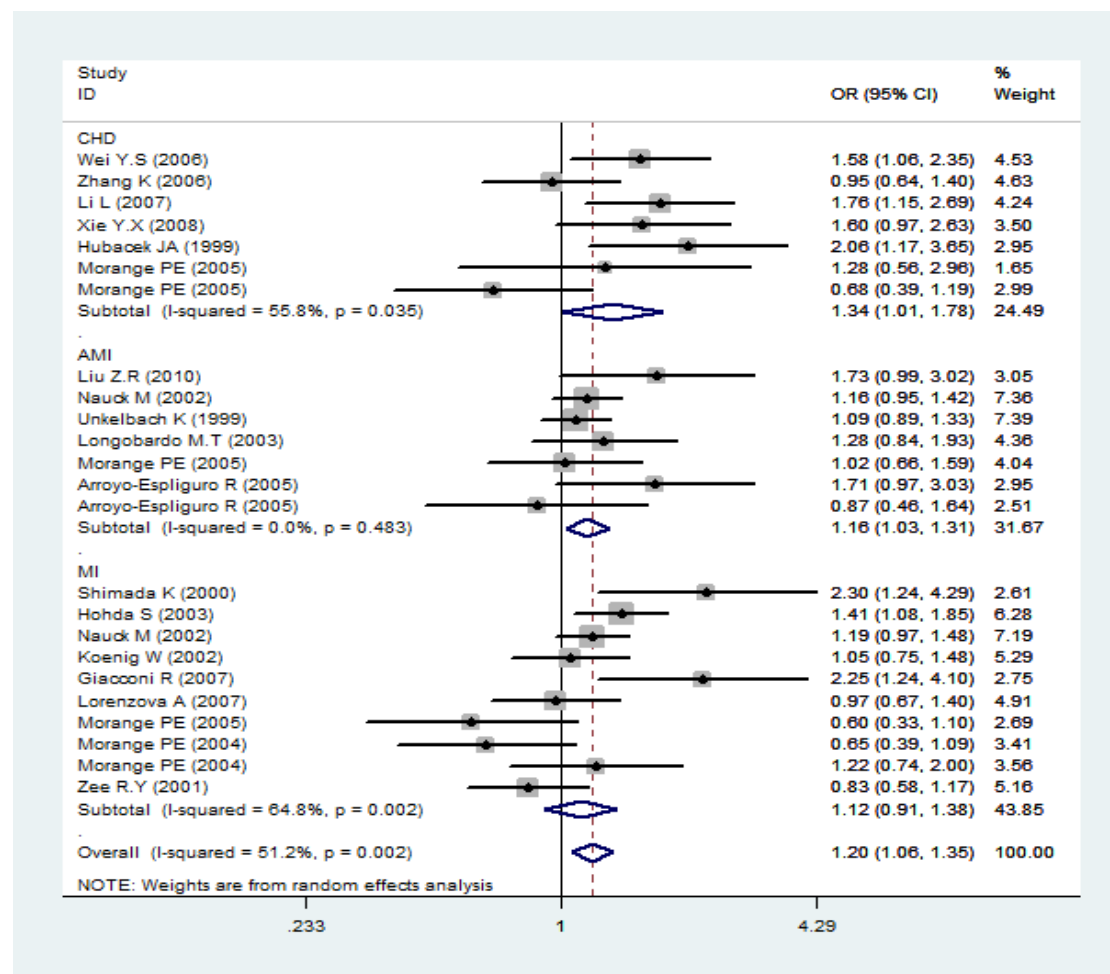

c1

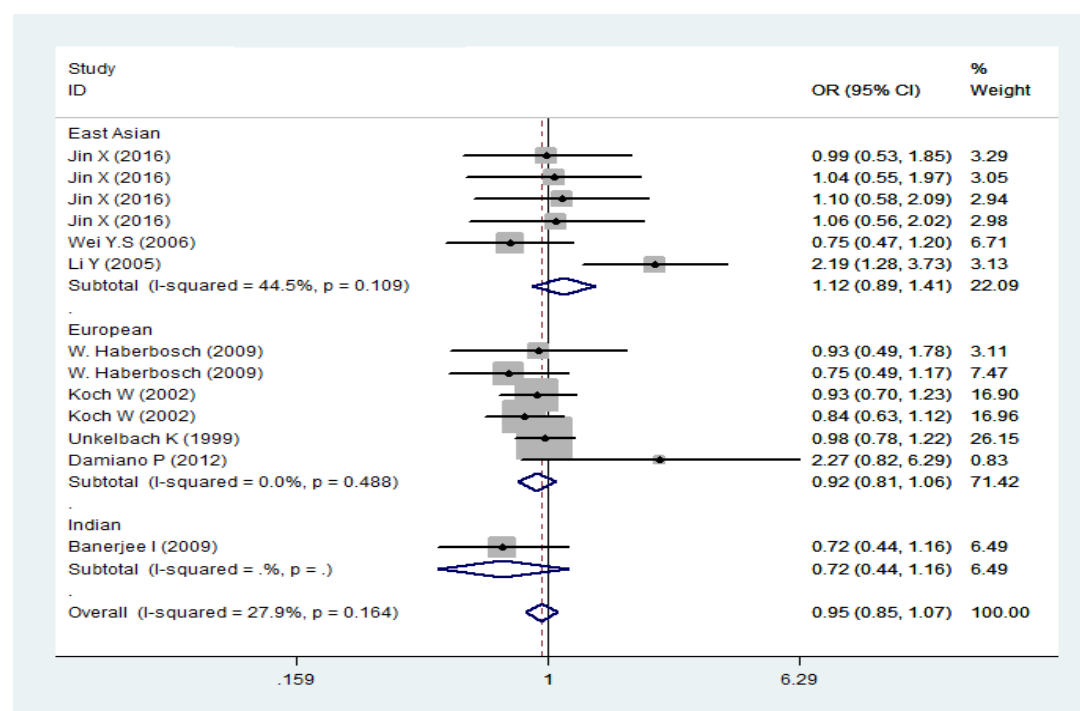

c2

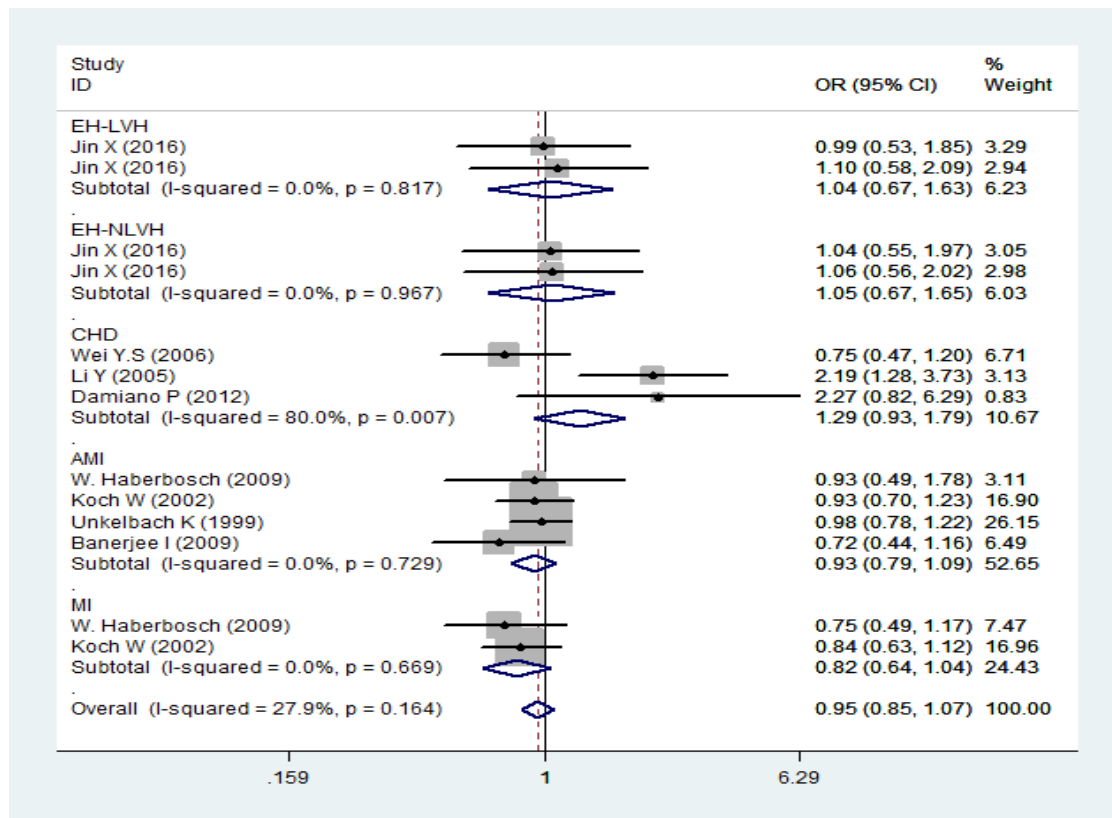

d1

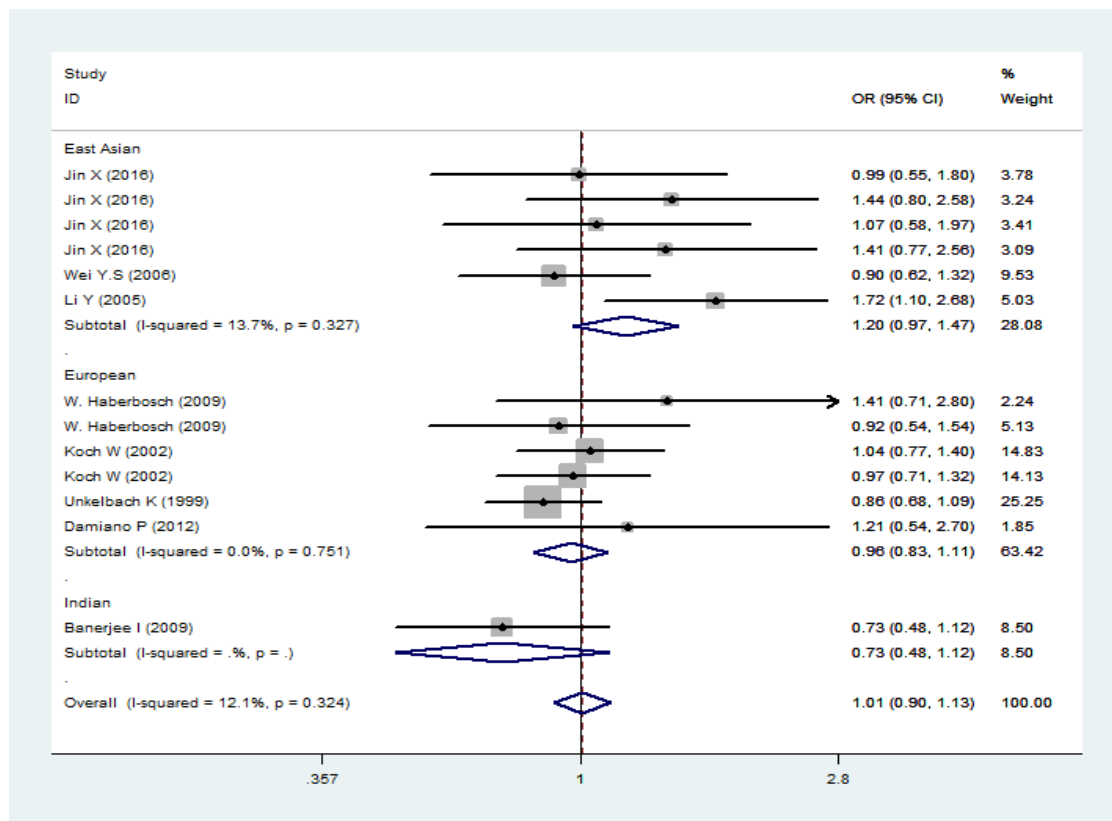

d2

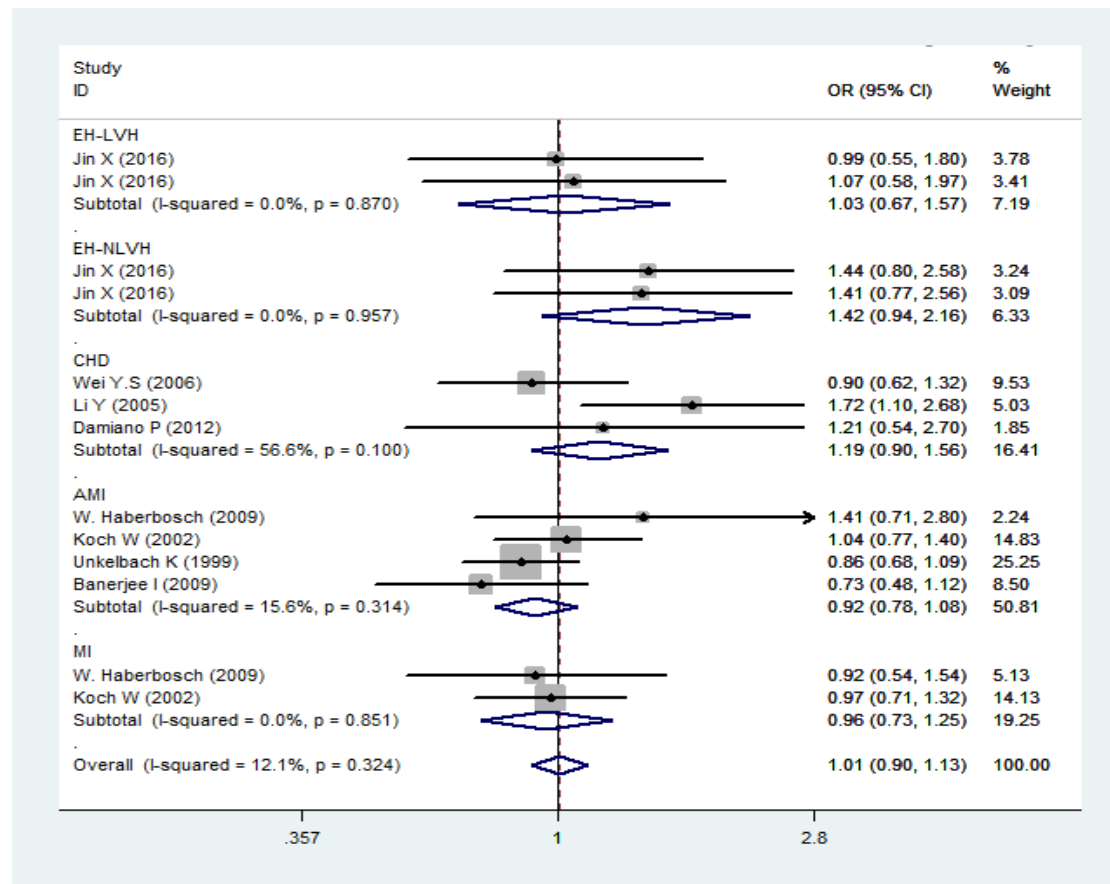

**Figure S1. Forest plot for the meta-analysis of the association between CD14 gene polymorphisms and CVD under the Dominant and Recessive models**

- (a1) rs2569190 and CVD. (CC VS.TT+CT), stratification by ethnicity
- (a2) rs2569190 and CVD. (CC VS.TT+CT), stratification by endpoints
- (b1) rs2569190 and CVD. (TT VS.CC+CT), stratification by ethnicity
- (b2) rs2569190 and CVD. (TT VS.CC+CT), stratification by endpoints
- (c1) C-159T and CVD. (CC VS.TT+CT), stratification by ethnicity
- (c2) C-159T and CVD. (CC VS.TT+CT), stratification by endpoints
- (d1) C-159T and CVD. (TT VS.CC+CT), stratification by ethnicity
- (d2) C-159T and CVD. (TT VS.CC+CT), stratification by endpoints

**a**

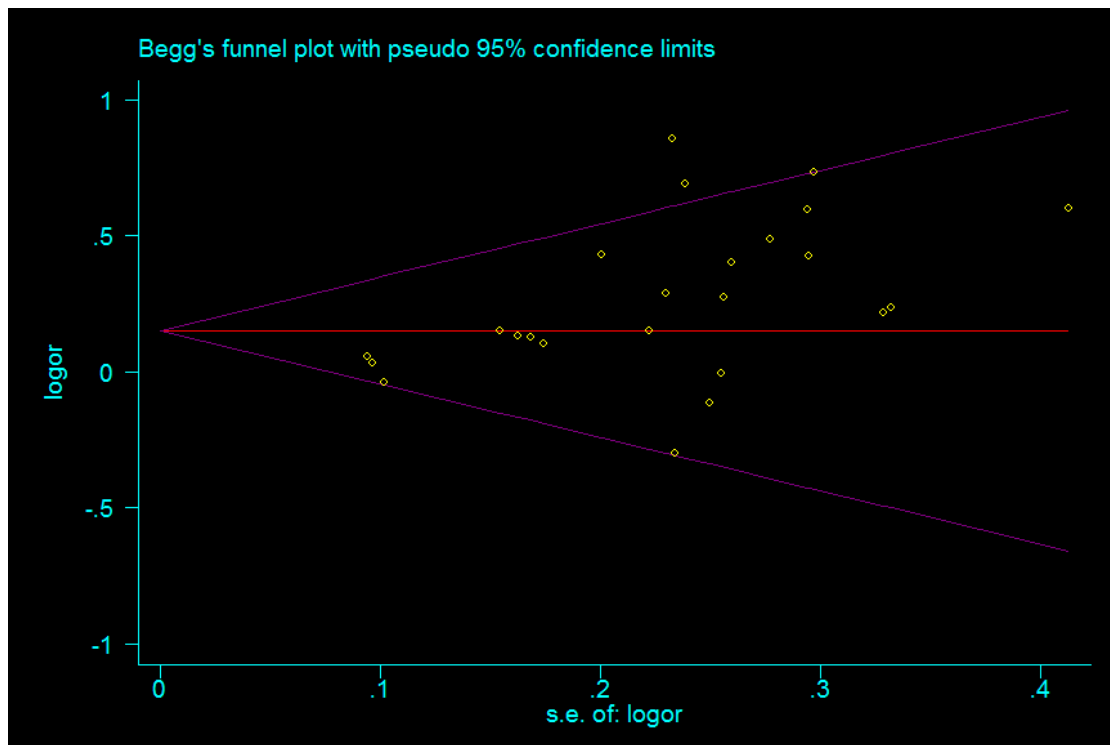

**b**

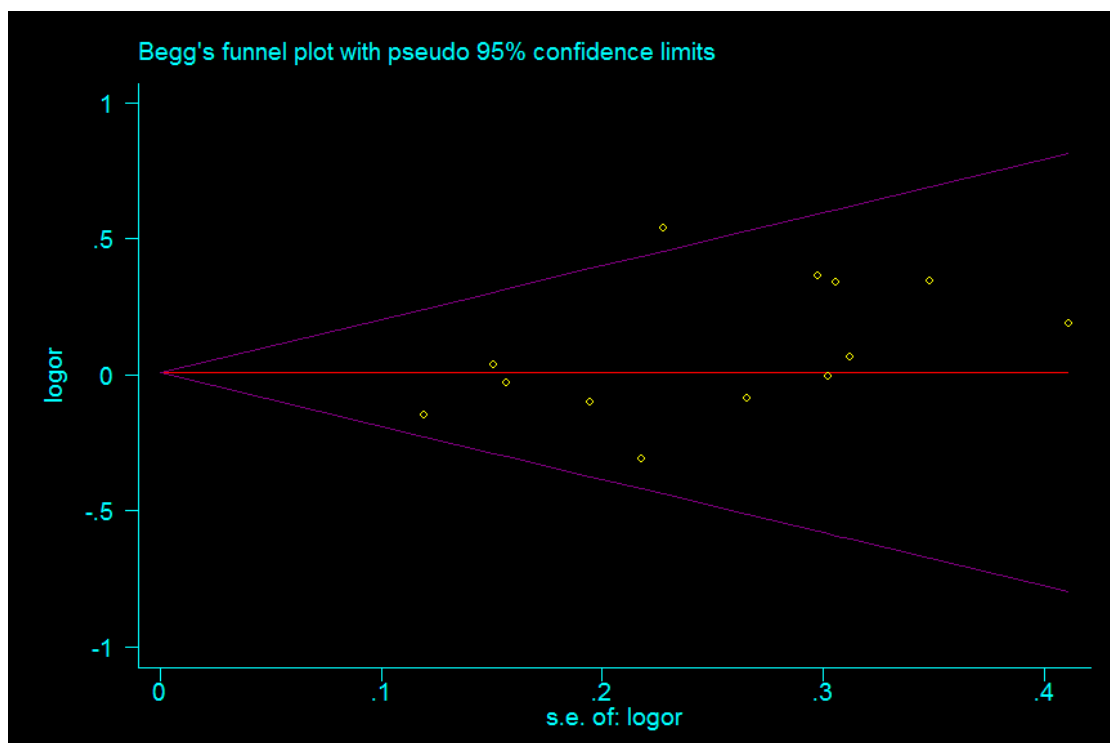

c

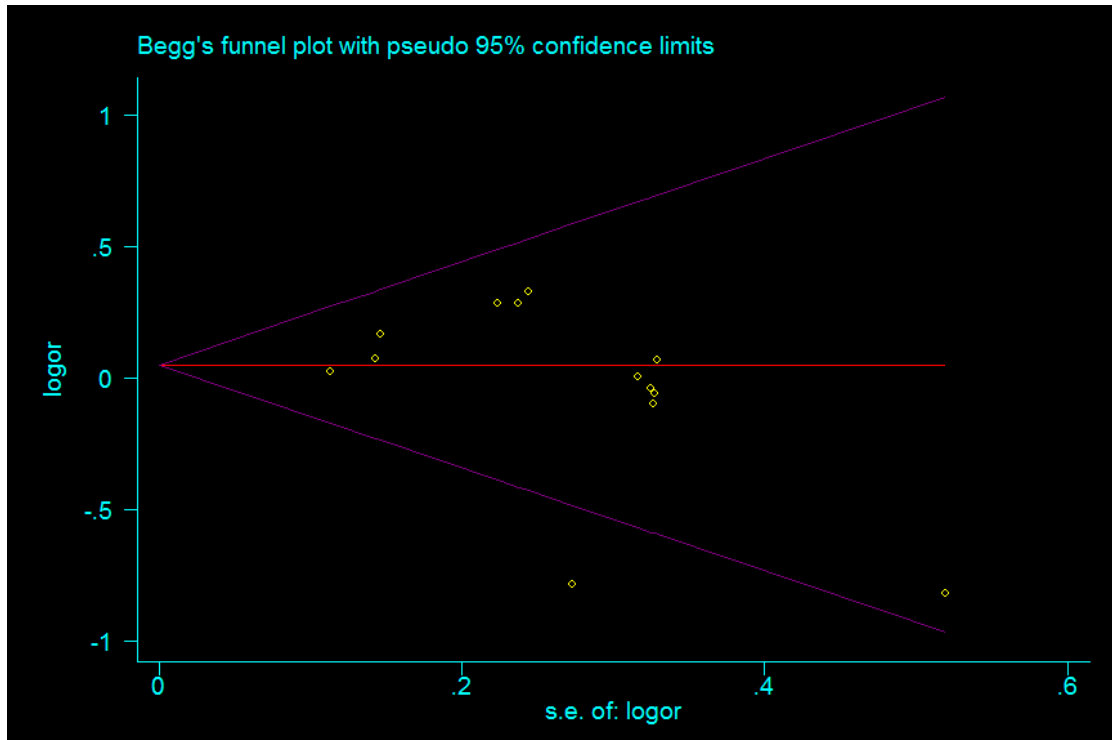

d

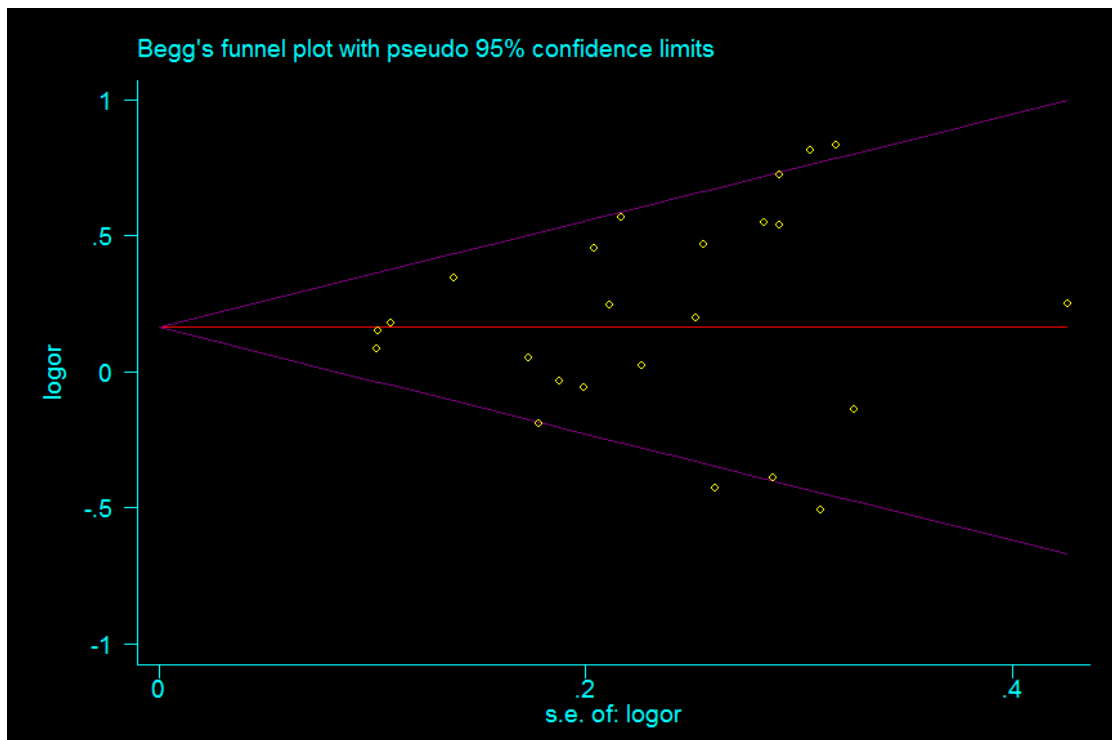

**Figure S2. Begg's funnel plot of publication bias in the meta-analysis of the association of CD14 polymorphisms with CVD risk**

(a) rs2569190 and CVD. (CC VS.TT+CT)

(b) rs2569190 and CVD. (TT VS.CC+CT)

(c) C-159T and CVD. (CC VS.TT+CT)

(d) C-159T and CVD. (TT VS.CC+CT)

**a**

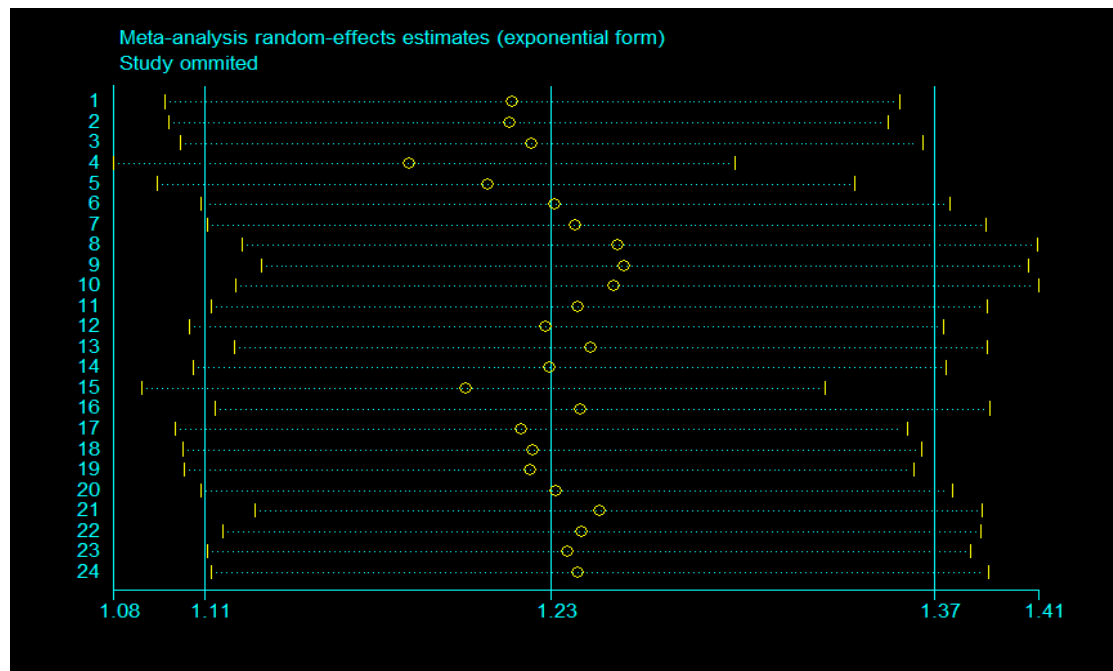

**b**

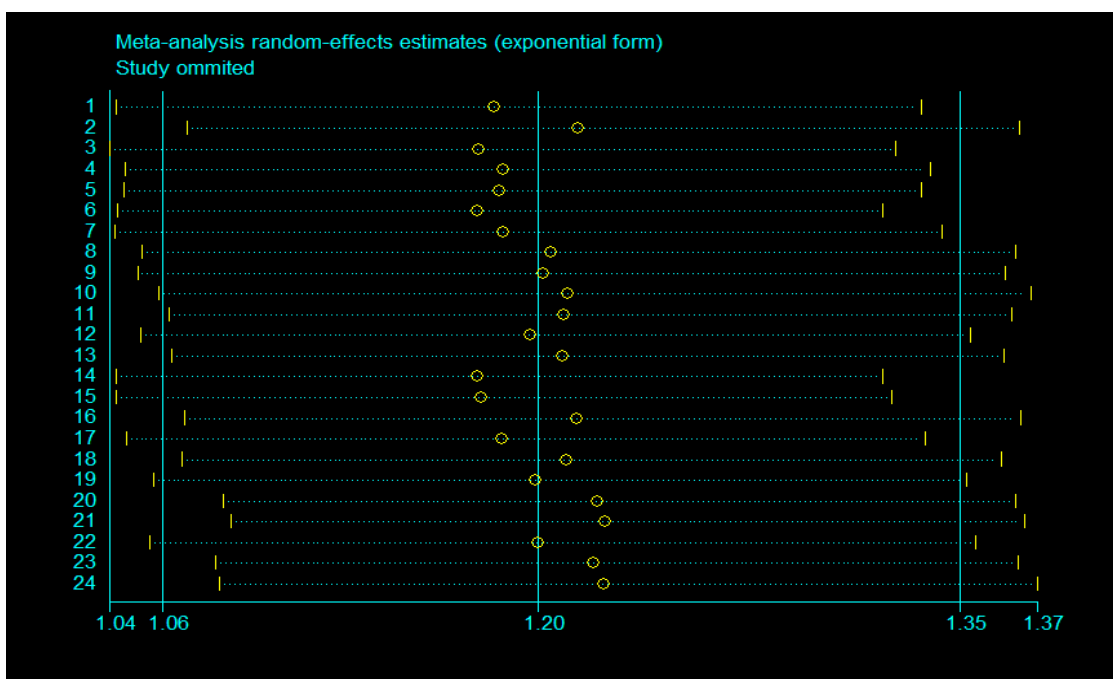

c

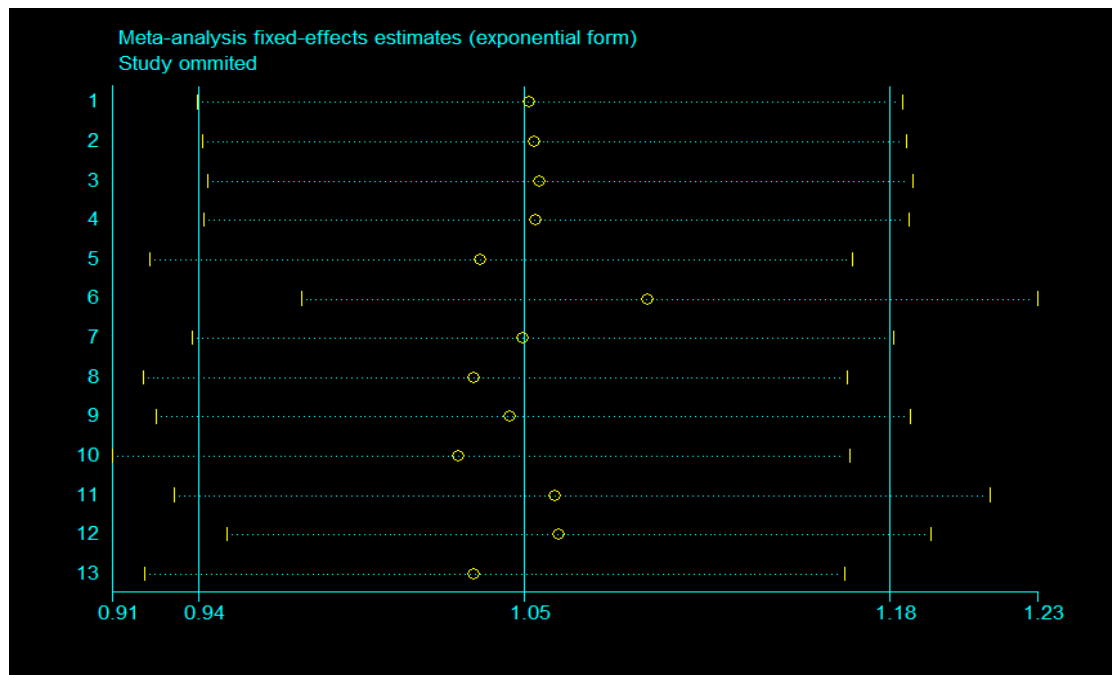

d

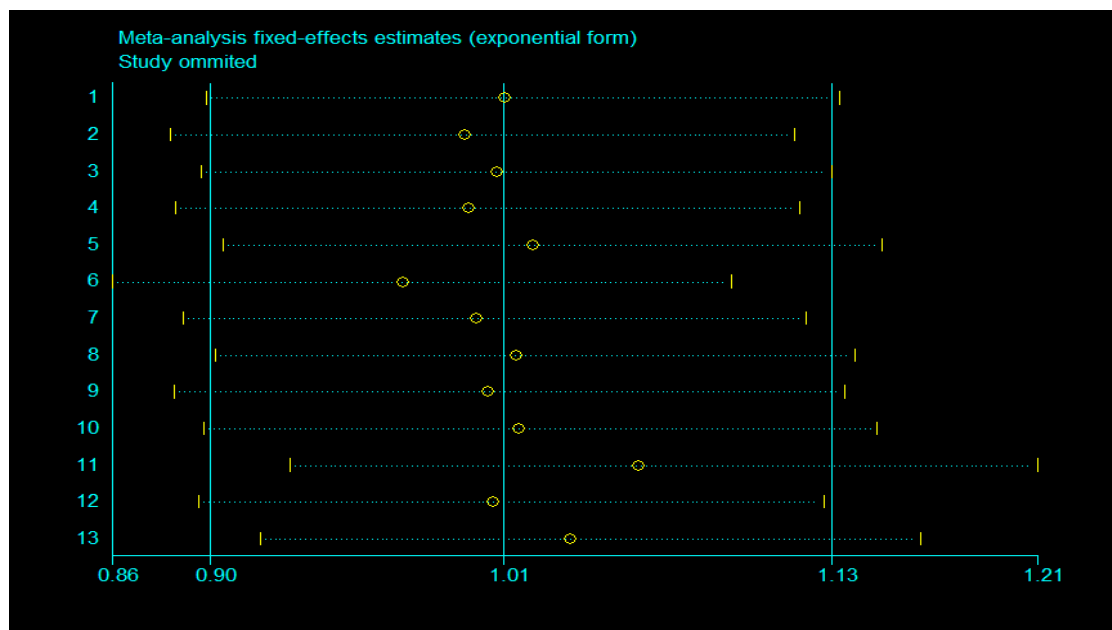

**Figure S3. Sensitivity analysis to assess the stability of the meta-analysis**

(a) rs2569190 and CVD. (CC VS.TT+CT)

(b) rs2569190 and CVD. (TT VS.CC+CT)

(c) C-159T and CVD. (CC VS.TT+CT)

(d) C-159T and CVD. (TT VS.CC+CT)
